# Supplementary material for: Did Access to Care Improve Since Passage of the Veterans Choice Act? Differences Between Rural and Urban Veterans
Source: PubMed Central journal article supplement — Med Care. 2021 May 13;59(6 Suppl 3):S270–8. doi: 10.1097/MLR.0000000000001490 (PMC8132901; doi:10.1097/mlr.0000000000001490), 2021-05-13
Supplement: mlr-59-s270-s001.pdf [file mlr-59-s270-s001.pdf]

**Figure 1. Box Plots**

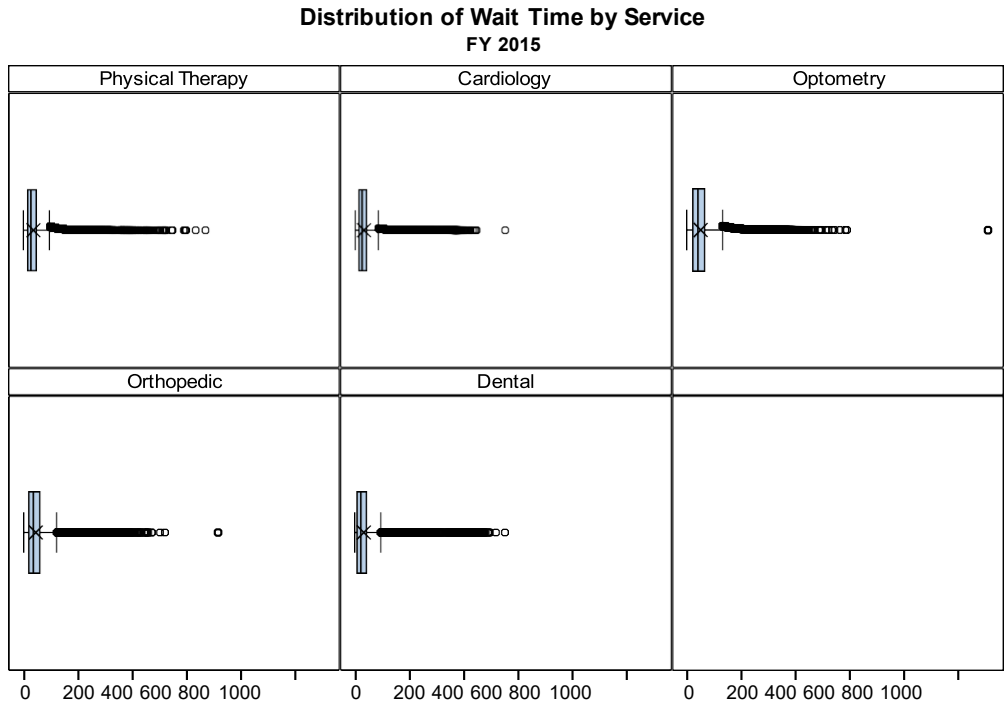

Days between when a consult is created and the visit date

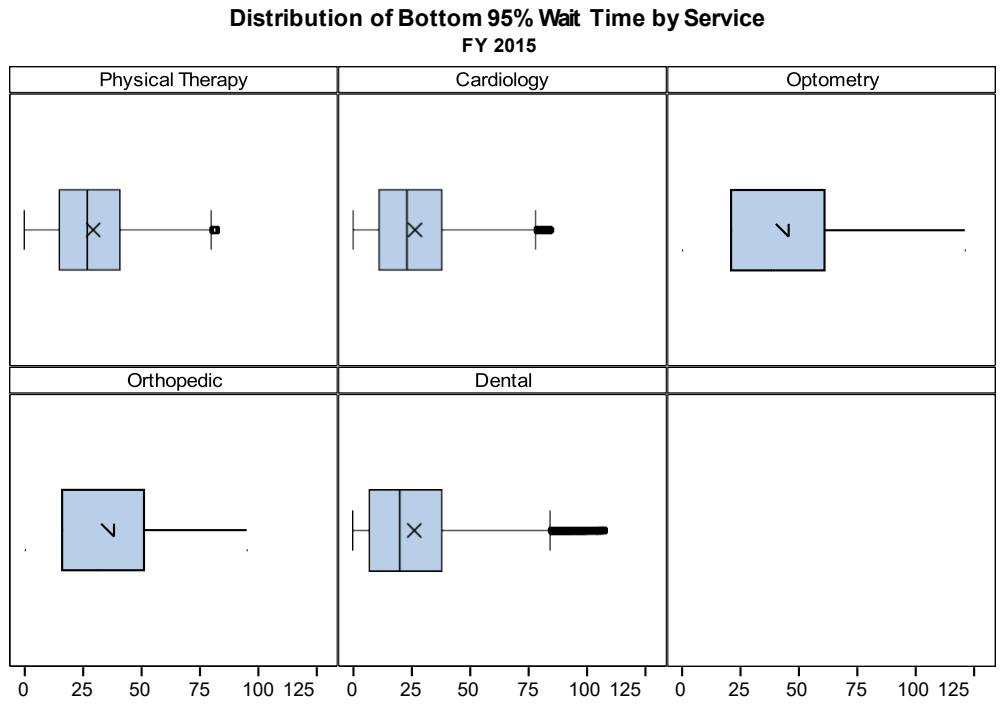

Days between when a consult is created and the visit date

**Table 1. Mean Consult Wait Times With and Without top 5% during FY15<sup>1</sup> and FY18<sup>1</sup>**

|                         | FY15 (all data) |                 |        | FY18 (all data) |       |        | FY15 (95%) |       |        | FY18 (95%) |       |        |
|-------------------------|-----------------|-----------------|--------|-----------------|-------|--------|------------|-------|--------|------------|-------|--------|
|                         | mean            | SD <sup>2</sup> | median | mean            | SD    | median | mean       | SD    | median | mean       | SD    | median |
| <b>Physical Therapy</b> | 37.25           | 33.94           | 28     | 28.67           | 23.51 | 24     | 29.52      | 19.02 | 27     | 26.05      | 17.48 | 23     |
| <b>Cardiology</b>       | 32.45           | 32.85           | 25     | 29.40           | 27.24 | 23     | 26.47      | 19.25 | 23     | 24.87      | 18.71 | 21     |
| <b>Optometry</b>        | 51.29           | 43.61           | 41     | 40.18           | 34.39 | 32     | 42.87      | 27.66 | 38     | 35.36      | 25.70 | 30     |
| <b>Orthopedic</b>       | 44.01           | 38.41           | 35     | 31.94           | 25.62 | 27     | 35.47      | 23.15 | 31     | 29.00      | 19.18 | 27     |
| <b>Dental</b>           | 32.99           | 41.53           | 22     | 32.29           | 36.89 | 21     | 26.21      | 23.61 | 20     | 25.83      | 23.32 | 20     |

<sup>1</sup> VHA Fiscal Year (FY) October 1 - September 30

<sup>2</sup> Standard deviation (SD)

**Table 2. Veteran Characteristics across Rural/Urban Strata, Service Types and Care Settings in FY18<sup>1</sup>**

|                                       | Overall      | Rural        | Urban        | Effect Size <sup>§</sup> | RCC <sup>2</sup> | RVA <sup>3</sup> | Effect Size <sup>^</sup> | UCC <sup>4</sup> | UVA <sup>5</sup> | Effect Size <sup>^</sup> |
|---------------------------------------|--------------|--------------|--------------|--------------------------|------------------|------------------|--------------------------|------------------|------------------|--------------------------|
| <b>N New Patient consults</b>         | 697,822      | 235,186      | 462,636      |                          | 70,553           | 164,633          |                          | 87,426           | 375,210          |                          |
| <b>N Veterans<sup>6</sup></b>         | 623,368      | 210,831      | 412,537      |                          | 63,523           | 147,308          |                          | 77,915           | 334,622          |                          |
| <b>Age in FY15 (mean (sd))</b>        | 58.0 (15.12) | 59.9 (14.17) | 57.1 (15.50) | 0.184                    | 59.5 (14.24)     | 60.0 (14.14)     | 0.035                    | 55.8 (15.50)     | 57.4 (15.48)     | 0.105                    |
| <b>Nosos Risk Score (mean (sd))</b>   | 1.40 (1.85)  | 1.31 (1.68)  | 1.45 (1.92)  | 0.078                    | 1.20 (1.51)      | 1.35 (1.75)      | 0.096                    | 1.31 (1.68)      | 1.48 (1.97)      | 0.091                    |
| <b>Gender = M (%)</b>                 | 90%          | 92%          | 89%          | 0.119                    | 92%              | 93%              | 0.026                    | 88%              | 89%              | 0.047                    |
| <b>Priority Group<sup>7</sup> (%)</b> |              |              |              |                          |                  |                  |                          |                  |                  |                          |
| 1-2                                   | 48%          | 48%          | 48%          | 0.015                    | 52%              | 46%              | 0.123                    | 58%              | 46%              | 0.233                    |
| 3                                     | 21%          | 21%          | 20%          | 0.014                    | 20%              | 21%              | 0.021                    | 18%              | 21%              | 0.06                     |
| 4-6                                   | 32%          | 32%          | 31%          | 0.004                    | 28%              | 33%              | 0.115                    | 24%              | 33%              | 0.204                    |
| <b>Race/Ethnicity (%)</b>             |              |              |              |                          |                  |                  |                          |                  |                  |                          |
| Black, non-Hispanic                   | 19.6         | 9%           | 25%          | 0.427                    | 8%               | 10%              | 0.054                    | 20%              | 26%              | 0.139                    |
| Hispanic                              | 7.2          | 3%           | 9%           | 0.246                    | 4%               | 3%               | 0.061                    | 12%              | 9%               | 0.105                    |
| Other                                 | 3.1          | 3%           | 3%           | 0.052                    | 3%               | 2%               | 0.049                    | 4%               | 3%               | 0.024                    |
| White, non-Hispanic                   | 65.6         | 81%          | 58%          | 0.504                    | 79%              | 81%              | 0.05                     | 59%              | 58%              | 0.014                    |
| Unknown                               | 4.4          | 4%           | 4%           | 0.002                    | 6%               | 4%               | 0.076                    | 6%               | 4%               | 0.07                     |
| <b>Marital Status (%)</b>             |              |              |              |                          |                  |                  |                          |                  |                  |                          |
| Divorced/Separated                    | 27.9         | 25%          | 29%          | 0.090                    | 25%              | 26%              | 0.019                    | 28%              | 30%              | 0.043                    |
| Married                               | 53.8         | 60%          | 50%          | 0.201                    | 61%              | 60%              | 0.026                    | 54%              | 50%              | 0.099                    |
| Single                                | 12.5         | 8%           | 15%          | 0.199                    | 8%               | 8%               | <0.001                   | 13%              | 15%              | 0.056                    |
| Widowed                               | 4.7          | 5%           | 5%           | 0.023                    | 5%               | 5%               | 0.034                    | 4%               | 5%               | 0.063                    |
| Unknown                               | 1.2          | 1%           | 1%           | 0.008                    | 1%               | 1%               | 0.026                    | 1%               | 1%               | 0.02                     |

<sup>§</sup> Rural vs Urban

<sup>^</sup> CC vs VA

<sup>1</sup> VHA Fiscal Year (FY) October 1 - September 30

<sup>2</sup> RCC represents rural Veterans using Community Care

<sup>3</sup> RVA represents rural Veterans using Veterans Health Affairs

<sup>4</sup> UCC represents urban Veterans using Community Care

<sup>5</sup> UVA represents urban Veterans using Veterans Health Affairs

<sup>6</sup> If a Veteran used more than 1 of the 5 study services in a year, we assigned the Veteran to the site of care of the service used first.

<sup>7</sup> Priority Group 1: Veterans with VHA-rated service-connected disabilities 50% or more disabling; Veterans determined by VHA to be unemployable due to service-connected conditions; Priority Group 2: Veterans with VHA-rated service-connected disabilities 30% or 40% disabling; Priority Group 3: Veterans who are Former Prisoners of War (POWs); Veterans awarded a Purple Heart medal; Veterans whose discharge was for a disability that was incurred or aggravated in the line of duty; Veterans with VHA-rated service-connected disabilities 10% or 20% disabling; Veterans awarded "benefits for individuals disabled by treatment or vocational rehabilitation;" Veterans awarded the Medal Of Honor (MOH); Priority Group 4: Veterans who receive aid and attendance or housebound benefits from VHA; Veterans who are considered "catastrophically disabled" by VHA; Priority Group 5: Non-service-connected Veterans and non-compensable service-connected Veterans rated 0% disabled by VHA with annual income below VHA's adjusted income limits; Veterans receiving VHA pension benefits; Veterans eligible for Medicaid programs; Priority Group 6: Compensable 0% service-connected Veterans; Veterans exposed to Ionizing Radiation during atmospheric testing or during the occupation of Hiroshima and Nagasaki; Project 112/SHAD participants; Veterans who served in Vietnam; Veterans of the Persian Gulf War; Veterans who served on active duty at Camp Lejeune for at least 30 days (US Department of Veterans Affairs 2017.) We grouped priority groups based on the following: Groups 1-2 (more service-connected), Group 3 (a mix of eligibility criteria) and Groups 4-6 (not service connected).

**Table 3. Unadjusted Consult Wait Time Measures across Rural/Urban Strata, Service Types, and Care Settings during FY15<sup>1</sup> and FY18<sup>1</sup>**

2A: Number of Cases

|                                    | Overall | Rural   | Urban   |  | RCC <sup>2</sup> | RVA <sup>3</sup> |  | UCC <sup>4</sup> | UVA <sup>5</sup> | Effect Size <sup>^</sup> |
|------------------------------------|---------|---------|---------|--|------------------|------------------|--|------------------|------------------|--------------------------|
| <i>FY15 N new patient consults</i> | 537,174 | 178,841 | 358,333 |  | 36,725           | 142,116          |  | 41,882           | 316,451          |                          |
| <i>FY18 N new patient consults</i> | 697,822 | 235,186 | 462,636 |  | 70,553           | 164,633          |  | 87,426           | 375,210          |                          |
| <i>FY15 N Veterans</i>             | 489,334 | 163,789 | 325,536 |  | 35,669           | 131,471          |  | 41,037           | 289,119          |                          |
| <i>FY18 N Veterans</i>             | 617,323 | 209,008 | 408,315 |  | 66,880           | 149,930          |  | 83,549           | 337,084          |                          |

2B: Mean Waiting Time and Effect Size (or P-value)

| <b>FY15</b>         | Overall | Rural | Urban | Effect Size <sup>§</sup> | RCC   | Mean  | Effect Size <sup>^</sup> | UCC   | UVA   | Effect Size <sup>^</sup> |
|---------------------|---------|-------|-------|--------------------------|-------|-------|--------------------------|-------|-------|--------------------------|
| <b>Service Type</b> |         |       |       |                          |       |       |                          |       |       |                          |
| Physical Therapy    | 29.52   | 27.25 | 30.55 | 0.176                    | 27.77 | 27.07 | 0.038                    | 29.23 | 30.74 | 0.080                    |
| Cardiology          | 26.47   | 26.03 | 26.79 | -0.002                   | 27.86 | 25.75 | 0.107                    | 28.46 | 26.65 | 0.091                    |
| Optometry           | 42.87   | 42.67 | 42.87 | 0.000                    | 42.64 | 42.69 | 0.002                    | 41.98 | 43.15 | 0.043                    |
| Orthopedic          | 35.47   | 35.18 | 35.67 | -0.001                   | 34.85 | 35.26 | 0.018                    | 37.27 | 35.45 | 0.076                    |
| Dental              | 26.21   | 26.26 | 26.51 | 0.000                    | 28.45 | 23.98 | 0.195                    | 27.58 | 25.80 | 0.074                    |

**FY18**

**Service Type**

|                  |       |       |       |       |       |       |       |       |       |       |
|------------------|-------|-------|-------|-------|-------|-------|-------|-------|-------|-------|
| Physical Therapy | 26.05 | 23.97 | 26.92 | 0.010 | 25.92 | 23.31 | 0.156 | 29.55 | 26.54 | 0.173 |
| Cardiology       | 24.87 | 25.53 | 24.43 | 0.003 | 27.62 | 25.21 | 0.127 | 27.66 | 24.16 | 0.189 |
| Optometry        | 35.36 | 35.27 | 34.76 | 0.001 | 36.51 | 34.55 | 0.077 | 36.87 | 34.11 | 0.109 |
| Orthopedic       | 29.00 | 29.68 | 28.43 | 0.003 | 32.79 | 28.93 | 0.194 | 33.00 | 27.80 | 0.264 |
| Dental           | 25.83 | 26.60 | 25.05 | 0.003 | 29.39 | 23.70 | 0.244 | 28.23 | 22.93 | 0.229 |

**FY15-FY18 Difference (%  
Decline FY15-FY18)**

**Service Type**

|                  |      |            | <i>P-value</i> <sup>~</sup> |             |            | <i>P-value</i> |             |            | <i>P-value</i> |             |
|------------------|------|------------|-----------------------------|-------------|------------|----------------|-------------|------------|----------------|-------------|
| Physical Therapy | 0.12 | 3.27 (12)  | 3.64 (0.12)                 | < 0.001 *** | 1.85 (7)   | 3.76 (0.14)    | < 0.001 *** | -0.32 (-1) | 4.2 (14)       | < 0.001 *** |
| Cardiology       | 0.06 | 0.5 (2)    | 2.36 (0.09)                 | < 0.001 *** | 0.24 (1)   | 0.54 (0.02)    | 0.5679      | 0.8 (3)    | 2.49 (9)       | 0.005 **    |
| Optometry        | 0.18 | 7.4 (17)   | 8.11 (0.19)                 | < 0.001 *** | 6.14 (14)  | 8.14 (0.19)    | < 0.001 *** | 5.11 (12)  | 9.03 (21)      | < 0.001 *** |
| Orthopedic       | 0.18 | 5.5 (16)   | 7.24 (0.2)                  | < 0.001 *** | 2.06 (6)   | 6.34 (0.18)    | < 0.001 *** | 4.27 (11)  | 7.65 (22)      | < 0.001 *** |
| Dental           | 0.01 | -0.34 (-1) | 1.46 (0.06)                 | < 0.001 *** | -0.94 (-3) | 0.28 (0.01)    | 0.0389 *    | -0.65 (-2) | 2.87 (11)      | < 0.001 *** |

2C: Probability of Waiting >30 Days and Effect Size (or P-value)

| <b>FY15</b> | Overall | Rural | Urban | Effect Size <sup>§</sup> | RCC | RVA | Effect Size <sup>^</sup> | UCC | UVA | Effect Size <sup>^</sup> |
|-------------|---------|-------|-------|--------------------------|-----|-----|--------------------------|-----|-----|--------------------------|
|-------------|---------|-------|-------|--------------------------|-----|-----|--------------------------|-----|-----|--------------------------|

**Service Type**

|                  |      |      |      |       |      |      |       |      |      |       |
|------------------|------|------|------|-------|------|------|-------|------|------|-------|
| Physical Therapy | 0.41 | 0.36 | 0.44 | 0.153 | 0.37 | 0.36 | 0.021 | 0.40 | 0.44 | 0.083 |
| Cardiology       | 0.36 | 0.35 | 0.37 | 0.044 | 0.39 | 0.34 | 0.092 | 0.40 | 0.37 | 0.076 |
| Optometry        | 0.6  | 0.60 | 0.60 | 0.007 | 0.60 | 0.60 | 0.008 | 0.59 | 0.61 | 0.032 |
| Orthopedic       | 0.51 | 0.51 | 0.51 | 0.004 | 0.51 | 0.52 | 0.020 | 0.55 | 0.51 | 0.091 |
| Dental           | 0.33 | 0.34 | 0.34 | 0.008 | 0.37 | 0.30 | 0.154 | 0.36 | 0.33 | 0.068 |

**FY18**

**Service Type**

|                  |      |      |      |       |      |      |       |      |      |       |
|------------------|------|------|------|-------|------|------|-------|------|------|-------|
| Physical Therapy | 0.34 | 0.29 | 0.37 | 0.160 | 0.31 | 0.29 | 0.046 | 0.39 | 0.36 | 0.052 |
| Cardiology       | 0.32 | 0.34 | 0.31 | 0.055 | 0.37 | 0.33 | 0.079 | 0.37 | 0.31 | 0.127 |
| Optometry        | 0.49 | 0.49 | 0.47 | 0.034 | 0.51 | 0.48 | 0.068 | 0.53 | 0.46 | 0.142 |
| Orthopedic       | 0.41 | 0.42 | 0.39 | 0.053 | 0.47 | 0.41 | 0.129 | 0.48 | 0.38 | 0.190 |
| Dental           | 0.32 | 0.33 | 0.30 | 0.069 | 0.38 | 0.29 | 0.187 | 0.35 | 0.27 | 0.160 |

**FY15-FY18 Difference (% Decline FY15-FY18)**

**Service Type**

|                  |      |           | <i>P-value</i> |             |            | <i>P-value</i> |             |           | <i>P-value</i> |             |
|------------------|------|-----------|----------------|-------------|------------|----------------|-------------|-----------|----------------|-------------|
| Physical Therapy | 0.07 | 0.07 (19) | 0.07 (16)      | 0.46        | 0.06 (16)  | 0.07 (20)      | 0.486       | 0.01 (3)  | 0.08 (17)      | < 0.001 *** |
| Cardiology       | 0.04 | 0.01 (2)  | 0.05 (15)      | 0.001 **    | 0.01 (4)   | 0.01 (2)       | 0.6260      | 0.03 (8)  | 0.06 (15)      | 0.005 **    |
| Optometry        | 0.11 | 0.11 (18) | 0.13 (22)      | 0.48        | 0.09 (14)  | 0.12 (21)      | 0.001 **    | 0.06 (11) | 0.15 (25)      | 0.001 **    |
| Orthopedic       | 0.11 | 0.09 (18) | 0.12 (23)      | < 0.001 *** | 0.03 (7)   | 0.11 (21)      | < 0.001 *** | 0.08 (14) | 0.12 (24)      | < 0.001 *** |
| Dental           | 0.02 | 0 (1)     | 0.04 (11)      | < 0.001 *** | -0.01 (-1) | 0.01 (3)       | 0.51        | 0.01 (4)  | 0.05 (17)      | < 0.001 *** |

§ Rural vs Urban

^ CC vs VA

~p-value reported for absolute difference (FY15-FY18 difference)

\* p-value<=0.05

\*\* p-value< 0.01

\*\*\* p-value<0.001

<sup>1</sup> VHA Fiscal Year (FY) October 1 - September 30

<sup>2</sup> RCC represents rural Veterans using Community Care

<sup>3</sup> RVA represents rural Veterans using Veterans Health Affairs

<sup>4</sup> UCC represents urban Veterans using Community Care

<sup>5</sup> UVA represents urban Veterans using Veterans Health Affairs

**Table 4. Logistic Regression Predicting Probability of Mean Consult Wait Time > 30 Days for Five Types of Services in FY15<sup>1</sup> and FY18<sup>1</sup>**

|                                                                | Type of Service             |                  |                  |                  |                  |
|----------------------------------------------------------------|-----------------------------|------------------|------------------|------------------|------------------|
|                                                                | Physical Therapy            | Cardiology       | Optometry        | Orthopedic       | Dental           |
| <b>N Veterans</b>                                              | 382,542                     | 229,880          | 260,286          | 245,728          | 82,469           |
| <b>N new patient consults</b>                                  | 392,750                     | 234,892          | 264,906          | 251,971          | 83,951           |
|                                                                | Log odds (SE <sup>2</sup> ) | Log odds (SE)    | Log odds (SE)    | Log odds (SE)    | Log odds (SE)    |
| <b>RCC<sup>3</sup></b>                                         | -0.01 (0.03)                | -0.55 (0.05) *** | 0.17 (0.03) ***  | 0.1 (0.04) *     | 0.1 (0.05)       |
| <b>RVA<sup>4</sup></b>                                         | -0.04 (0.02)                | -0.73 (0.03) *** | 0.19 (0.02) ***  | 0.14 (0.02) ***  | 0.09 (0.05)      |
| <b>UCC<sup>5</sup></b>                                         | 0.02 (0.03)                 | -0.52 (0.05) *** | 0.11 (0.03) ***  | 0.26 (0.03) ***  | 0.01 (0.05)      |
| <b>UVA<sup>6</sup></b>                                         | 0.20 (0.02) ***             | -0.66 (0.03) *** | 0.17 (0.02) ***  | 0.06 (0.02) *    | 0.16 (0.04) **   |
| <b>RCC * FY18</b>                                              | -0.28 (0.03) ***            | -0.06 (0.04)     | -0.31 (0.02) *** | -0.15 (0.04) *** | -0.01 (0.04)     |
| <b>RVA * FY18</b>                                              | -0.33 (0.01) ***            | -0.03 (0.02)     | -0.46 (0.02) *** | -0.45 (0.02) *** | -0.13 (0.04) **  |
| <b>UCC * FY18</b>                                              | -0.05 (0.03)                | -0.09 (0.05)     | -0.18 (0.02) *** | -0.33 (0.03) *** | -0.08 (0.03)     |
| <b>UVA * FY18</b>                                              | -0.3 (0.01) ***             | -0.21 (0.01) *** | -0.52 (0.01) *** | -0.51 (0.01) *** | -0.29 (0.03) *** |
| <b>Race/Ethnicity (Reference = white, non-Hispanic)</b>        |                             |                  |                  |                  |                  |
| Black, non-Hispanic                                            | 0.35 (0.01) ***             | 0.15 (0.02) ***  | 0.32 (0.01) ***  | 0.33 (0.02) ***  | 0.17 (0.03) ***  |
| Hispanic                                                       | 0.37 (0.02) ***             | 0.35 (0.03) ***  | 0.14 (0.02) ***  | -0.19 (0.03) *** | 0.21 (0.04) ***  |
| Other                                                          | 0.15 (0.03) ***             | 0.05 (0.05)      | 0.05 (0.03)      | -0.07 (0.04)     | 0.25 (0.07) **   |
| Unknown                                                        | 0.13 (0.03) ***             | -0.05 (0.04)     | 0.02 (0.02)      | -0.04 (0.03)     | 0.19 (0.06) *    |
| <b>Race/Ethnicity * FY18 (Reference = white, non-Hispanic)</b> |                             |                  |                  |                  |                  |
| Black, non-Hispanic * FY18                                     | -0.11 (0.02) ***            | -0.12 (0.02) *** | -0.30 (0.02) *** | -0.07 (0.02) *   | -0.02 (0.04)     |
| Hispanic * FY18                                                | -0.10 (0.03) **             | -0.37 (0.04) *** | -0.04 (0.03)     | 0.10 (0.03) *    | -0.20 (0.06) **  |
| Other * FY18                                                   | 0.07 (0.04)                 | -0.05 (0.06)     | -0.04 (0.05)     | 0.21 (0.05) ***  | -0.18 (0.09)     |
| Unknown * FY18                                                 | -0.05 (0.03)                | 0.11 (0.04)      | 0.05 (0.04)      | 0.09 (0.04)      | -0.22 (0.07) *   |
| <b>Male (Reference = female)</b>                               | -0.12 (0.01) ***            | -0.04 (0.02)     | -0.07 (0.01) *** | -0.04 (0.01) *   | -0.07 (0.03) *   |
| <b>Age (FY15)</b>                                              | -0.01 (0.00) ***            | 0.00 (0.00) ***  | 0.01 (0.00) ***  | 0.00(0.00)       | -0.01 (0.00) *** |
| <b>Nosos Risk Score</b>                                        | -0.04 (0.00)                | -0.04 (0.00)     | -0.03 (0.00)     | -0.04 (0.00)     | -0.08 (0.00)     |
| <b>Priority Group<sup>7</sup> (Reference = 1-2)</b>            |                             |                  |                  |                  |                  |
| Priority 3                                                     | -0.09 (0.01) ***            | -0.02 (0.01)     | -0.05 (0.01) *** | -0.05 (0.01) *** | -0.45 (0.03) *** |
| Priority 4-6                                                   | -0.07 (0.01) ***            | 0.00 (0.01)      | -0.06 (0.01) *** | -0.11 (0.01) *** | -0.67 (0.02) *** |
| <b>Marital Status (Reference = single)</b>                     |                             |                  |                  |                  |                  |
| Divorced/Separated                                             | 0.01 (0.01)                 | 0.03 (0.02)      | 0.01 (0.01)      | 0.05 (0.01) ***  | -0.03 (0.03)     |
| Married                                                        | 0.00 (0.01)                 | 0.03 (0.02)      | -0.01 (0.01)     | 0.09 (0.01) ***  | 0.03 (0.02)      |

|         |                |              |              |                 |              |
|---------|----------------|--------------|--------------|-----------------|--------------|
| Widowed | -0.05 (0.02) * | 0.01 (0.02)  | -0.02 (0.02) | 0.04 (0.02)     | -0.01 (0.05) |
| Unknown | 0.01 (0.03)    | -0.02 (0.05) | 0.03 (0.04)  | 0.20 (0.04) *** | 0.08 (0.08)  |

\* p-value < 0.01

\*\* p-value < 0.001

\*\*\* p-value < 0.0001

<sup>1</sup> VHA Fiscal Year (FY) October 1 - September 30

<sup>2</sup> Days refers to the coefficient associated with the variable in column 1

<sup>3</sup> Standard Error (SE)

<sup>4</sup> RCC represents rural Veterans using Community Care

<sup>5</sup> RVA represents rural Veterans using Veterans Health Affairs

<sup>6</sup> UCC represents urban Veterans using Community Care

<sup>7</sup> UVA represents urban Veterans using Veterans Health Affairs

<sup>8</sup> Priority Group 1: Veterans with VHA-rated service-connected disabilities 50% or more disabling; Veterans determined by VHA to be unemployable due to service-connected conditions; Priority Group 2: Veterans with VHA-rated service-connected disabilities 30% or 40% disabling; Priority Group 3: Veterans who are Former Prisoners of War (POWs); Veterans awarded a Purple Heart medal; Veterans whose discharge was for a disability that was incurred or aggravated in the line of duty; Veterans with VHA-rated service-connected disabilities 10% or 20% disabling; Veterans awarded "benefits for individuals disabled by treatment or vocational rehabilitation;" Veterans awarded the Medal Of Honor (MOH); Priority Group 4: Veterans who receive aid and attendance or housebound benefits from VHA; Veterans who are considered "catastrophically disabled" by VHA; Priority Group 5: Non-service-connected Veterans and non-compensable service-connected Veterans rated 0% disabled by VHA with annual income below VHA's adjusted income limits; Veterans receiving VHA pension benefits; Veterans eligible for Medicaid programs; Priority Group 6: Compensable 0% service-connected Veterans; Veterans exposed to Ionizing Radiation during atmospheric testing or during the occupation of Hiroshima and Nagasaki; Project 112/SHAD participants; Veterans who served in Vietnam; Veterans of the Persian Gulf War; Veterans who served on active duty at Camp Lejeune for at least 30 days (US Department of Veterans Affairs 2017.) We grouped priority groups based on the following: Groups 1-2 (more service-connected), Group 3 (a mix of eligibility criteria) and Groups 4-6 (not service connected).
